# Supplementary material
Source: PubMed Central journal article supplement (PMC549612)
Supplement: 7600527s1.pdf [file 7600527s1.pdf]

## Supplementary Material Vinciguerra et al.

### Materials and Methods

#### Plasmid and strain constructions

Plasmids and strains used in this study are summarised in supplementary Table II and Table III. To obtain the mutant strain GFP-*yra1-8*, the *yra1-8* coding sequence (Zenklusen *et al*, 2002) was amplified by PCR and cloned as a Sall fragment into pPS808-GAL-GFP (URA3, 2 $\mu$ ). GAL-GFP-*yra1-8* was subcloned as a BamHI/EcoRI fragment into YcPLac22 (TRP1, CEN) to generate pFS1975. GFP-*yra1-8* was subsequently subcloned as an XhoI PCR fragment behind the *YRA1* promoter in YcPLac22-HA-YRA1 $\pm$ 500 (Zenklusen *et al*, 2001; Zenklusen *et al*, 2002) to generate pFS2581. HA-GFP-*yra1-8* $\pm$ 500 was subcloned as a BamHI fragment in YcPLac111 to generate pFS2554.

Deletions of *MLP1*, *MLP2* or *RRP6* in the *YRA1* shuffle strain (*yra1::HIS3*, pURA3-*YRA1*) were obtained using PCR based homologous recombination as described (Longtine *et al*, 1998). The double deletion strain  $\Delta$ *mlp1/2* strain was obtained by crossing the single deletion *YRA1* shuffle *mlp1::TRP1* and *YRA1* shuffle *mlp2::TRP1* strains and analysis of segregants by PCR. The Mlp1-ProtA (FSY1567) and Mlp2-ProtA (FSY1351) strains were obtained by genomic tagging of *MLP1* and *MLP2* with a ProtA-TRP1 cassette in the *YRA1* shuffle background as described (Zenklusen *et al*, 2002).

The strains used in Table I have been obtained as following. *MLP1* and *MLP2* were deleted in NAB2 shuffle (ACY429) (Green *et al*, 2002) using a TRP1 marker to generate NAB2 shuffle  $\Delta$ *mlp1* (FSY2081) and NAB2 shuffle  $\Delta$ *mlp2* (FSY2082). The same marker was used in SUB2 shuffle (FSY1465) (Jensen *et al*, 2001) to obtain SUB2 shuffle  $\Delta$ *mlp1* (FSY1555) and SUB2 shuffle  $\Delta$ *mlp2* (FSY1556), in  $\Delta$ *cbp20* (FSY265) (Colot *et al*, 1996) and  $\Delta$ *cbp80* (FSY211) (Fortes *et al*, 1999) to obtain  $\Delta$ *cbp20 $\Delta$ *mlp1* (FSY2024),  $\Delta$ *cbp20 $\Delta$ *mlp2* (FSY2025) and  $\Delta$ *cbp80 $\Delta$ *mlp1* (FSY2026),  $\Delta$ *cbp80 $\Delta$ *mlp2* (FSY2027), in *rna14-1* (FSY582)****

and *rna15-1* (FSY538) (Minvielle-Sebastia *et al*, 1991) to obtain *rna14-1Δmlp1* (FSY2071), *rna14-1Δmlp2* (FSY2072) and *rna15-1Δmlp1* (FSY2073), *rna15-1Δmlp2* (FSY2074), in *pap1-1* (FSY1968) (Patel and Butler, 1992) to obtain *pap1-1Δmlp1* (FSY1986) and *pap1-1Δmlp2* (FSY1987), in *npl3-1* (FSY1175) (Henry *et al*, 1996) to obtain *npl3-1Δmlp1* (FSY1825) and *npl3-1Δmlp2* (FSY1826), in *mex67-5* (FSY1982) (Jimeno *et al*, 2002) to generate *mex67-5Δmlp1* (FSY1983) and *mex67-5Δmlp2* (FSY1984), in *rat8-2* (FSY535) (Snay-Hodge *et al*, 1998) to generate *rat8-2Δmlp1* (FSY2022) and *rat8-2Δmlp2* (FSY2023). *MLP1* and *MLP2* were also deleted in *Δhpr1* (FSY1624) (Zenklusen *et al*, 2002) using a HIS3 marker to generate *Δhpr1Δmlp1* (FSY1626) and *Δhpr1Δmlp2* (FSY1627). Only *MLP2* was deleted in *rat7-1* (FSY138) (Gorsch *et al*, 1995) using a HIS3 marker to generate *rat7-1Δmlp2* (FSY2021). Finally *RRP6* was deleted in *Δmlp1* (FSY1822) using a KAN resistance marker to generate *Δmlp1Δrrp6* (FSY1842) and in *Δmlp2* (FSY1823) to generate *Δmlp2Δrrp6* (FSY1843).

### **Antibodies and Western blotting**

Western blots were performed according to standard procedures. The anti-Yra1p antibody was used at a 1:2000 dilution, anti-Yra2p at 1:1500, anti-Nab2p (a gift from A. Corbett) at 1:10000, anti-Mex67p (a gift from C. Dargemont) at 1:10000 and anti-Crm1p at a 1:500 dilution. The protein signals were revealed with Super Signal West Pico substrate or West Femto Chemiluminescent substrate (Pierce).

### **Primer pairs used for chromatin immunoprecipitation (ChIP) analysis**

Immuno-precipitated DNA was analysed by quantitative PCR using the following primer pairs for the GAL1 promoter: OFS884 (5' GCCCCACAAACCTTCAAATTAACG 3') and OFS885 (5' CTTCGCTGATTAATTACCCAGAAATAA 3'), and for the intergenic

region, OFS710 (5' CGCATTACCAGACGGAGATGT 3') and OFS711 (5' CAAGCAAGCCTTGTGCATAAGA 3').

### **Global analysis of transcript levels with Affymetrix DNA microarrays**

The wild-type *YRA1*, *YRA1Δmlp2*, *GFP-yra1-8* and *GFP-yra1-8Δmlp2* strains were grown at 25°C to  $OD_{600}=0.6$  ( $0.5 \cdot 10^6$  cells/ml) in synthetic complete medium and shifted to 37°C for 2.5h. Total RNA was prepared using the hot phenol extraction procedure. Total RNA labelling and microarray hybridization was performed using the Affymetrix Gene Chip Yeast Genome S98 Array and protocols described by Affymetrix, Inc. (Santa Clara, CA). For each strain, the experiment was performed in duplicate using independent cultures and RNA preparations. Data were analyzed using Affymetrix Microarray suite 5.. To identify genes differentially expressed in *GFP-yra1-8*, each gene chip was compared to the two wild-type *YRA1* chips. A transcript was considered to decrease in *GFP-yra1-8* if (i) it scored as “decreased” in 3 out of 4 comparisons and if (ii) the four comparisons gave a mean expression change of at least two-fold, i.e., the median log ratio of the 4 comparisons was equal or less than  $-1$  as calculated by the Affymetrix software. 194 transcripts met these criteria (Supplementary Table I, column 3). The expression levels (mean intensity values of two gene chips) of these 194 transcripts in the four strains analyzed are also shown as such (columns 4-7) or as a percentage of wild-type *YRA1* (columns 8-11). The 58 transcripts for which the intensity or expression level ratio in *GFP-yra1-8Δmlp2* versus *GFP-yra1-8* was equal or higher to 1.5, were considered as significantly rescued by the loss of Mlp2p, i.e. significantly down-regulated by Mlp2p in *GFP-yra1-8* (columns 12-13, dark green). The 194 genes/transcripts have been numbered according to increasing *GFP-yra1-8Δmlp2/GFP-yra1-8* ratios.

Raw data are available at <http://www.ebi.ac.uk/arrayexpress/query/entry>, accession number E-MEXP-130.

## References for supplementary material, Vinciguerra et al.

- Chavez S, Garcia-Rubio M, Prado F, Aguilera A (2001) Hpr1 is preferentially required for transcription of either long or G+C-rich DNA sequences in *Saccharomyces cerevisiae*. *Mol Cell Biol* **21**: 7054-7064
- Colot HV, Stutz F, Rosbash M (1996) The yeast splicing factor Mud13p is a commitment complex component and corresponds to CBP20, the small subunit of the nuclear cap-binding complex. *Genes Dev* **10**: 1699-1708
- Fortes P, Kufel J, Fornerod M, Polycarpou-Schwarz M, Lafontaine D, Tollervey D, Mattaj JW (1999) Genetic and physical interactions involving the yeast nuclear cap-binding complex. *Mol Cell Biol* **19**: 6543-6553
- Gorsch LC, Dockendorff TC, Cole CN (1995) A conditional allele of the novel repeat-containing yeast nucleoporin RAT7/NUP159 causes both rapid cessation of mRNA export and reversible clustering of nuclear pore complexes. *J Cell Biol* **129**: 939-955
- Green DM, Marfatia KA, Crafton EB, Zhang X, Cheng X, Corbett AH (2002) Nab2p is required for poly(A) RNA export in *Saccharomyces cerevisiae* and is regulated by arginine methylation via Hmt1p. *J Biol Chem* **277**: 7752-7760
- Henry M, Borland CZ, Bossie M, Silver PA (1996) Potential RNA binding proteins in *Saccharomyces cerevisiae* identified as suppressors of temperature-sensitive mutations in NPL3. *Genetics* **142**: 103-115
- Jensen TH, Boulay J, Rosbash M, Libri D (2001) The DECD box putative ATPase Sub2p is an early mRNA export factor. *Curr Biol* **11**: 1711-1715
- Jimeno S, Rondon AG, Luna R, Aguilera A (2002) The yeast THO complex and mRNA export factors link RNA metabolism with transcription and genome instability. *Embo J* **21**: 3526-3535
- Legrain P, Rosbash M (1989) Some cis- and trans-acting mutants for splicing target pre-mRNA to the cytoplasm. *Cell* **57**: 573-583
- Longtine MS, McKenzie A, 3rd, Demarini DJ, Shah NG, Wach A, Brachat A, Philippsen P, Pringle JR (1998) Additional modules for versatile and economical PCR-based gene deletion and modification in *Saccharomyces cerevisiae*. *Yeast* **14**: 953-961
- Marfatia KA, Crafton EB, Green DM, Corbett AH (2003) Domain analysis of the *Saccharomyces cerevisiae* heterogeneous nuclear ribonucleoprotein, Nab2p. Dissecting the requirements for Nab2p-facilitated poly(A) RNA export. *J Biol Chem* **278**: 6731-6740
- Minvielle-Sebastia L, Winsor B, Bonneaud N, Lacroute F (1991) Mutations in the yeast RNA14 and RNA15 genes result in an abnormal mRNA decay rate; sequence analysis reveals an RNA-binding domain in the RNA15 protein. *Mol Cell Biol* **11**: 3075-3087
- Patel D, Butler JS (1992) Conditional defect in mRNA 3' end processing caused by a mutation in the gene for poly(A) polymerase. *Mol Cell Biol* **12**: 3297-3304
- Snay-Hodge CA, Colot HV, Goldstein AL, Cole CN (1998) Dbp5p/Rat8p is a yeast nuclear pore-associated DEAD-box protein essential for RNA export. *Embo J* **17**: 2663-2676
- Stutz F, Bachi A, Doerks T, Braun IC, Seraphin B, Wilm M, Bork P, Izaurralde E (2000) REF, an evolutionary conserved family of hnRNP-like proteins, interacts with TAP/Mex67p and participates in mRNA nuclear export. *RNA* **6**: 638-650
- Zenkhusen D, Vinciguerra P, Strahm Y, Stutz F (2001) The yeast hnRNP-Like proteins Yra1p and Yra2p participate in mRNA export through interaction with Mex67p. *Mol Cell Biol* **21**: 4219-4232
- Zenkhusen D, Vinciguerra P, Wyss JC, Stutz F (2002) Stable mRNP formation and export require cotranscriptional recruitment of the mRNA export factors Yra1p and Sub2p by Hpr1p. *Mol Cell Biol* **22**: 8241-8253

Supplementary Figure 1 Vinciguerra et al.

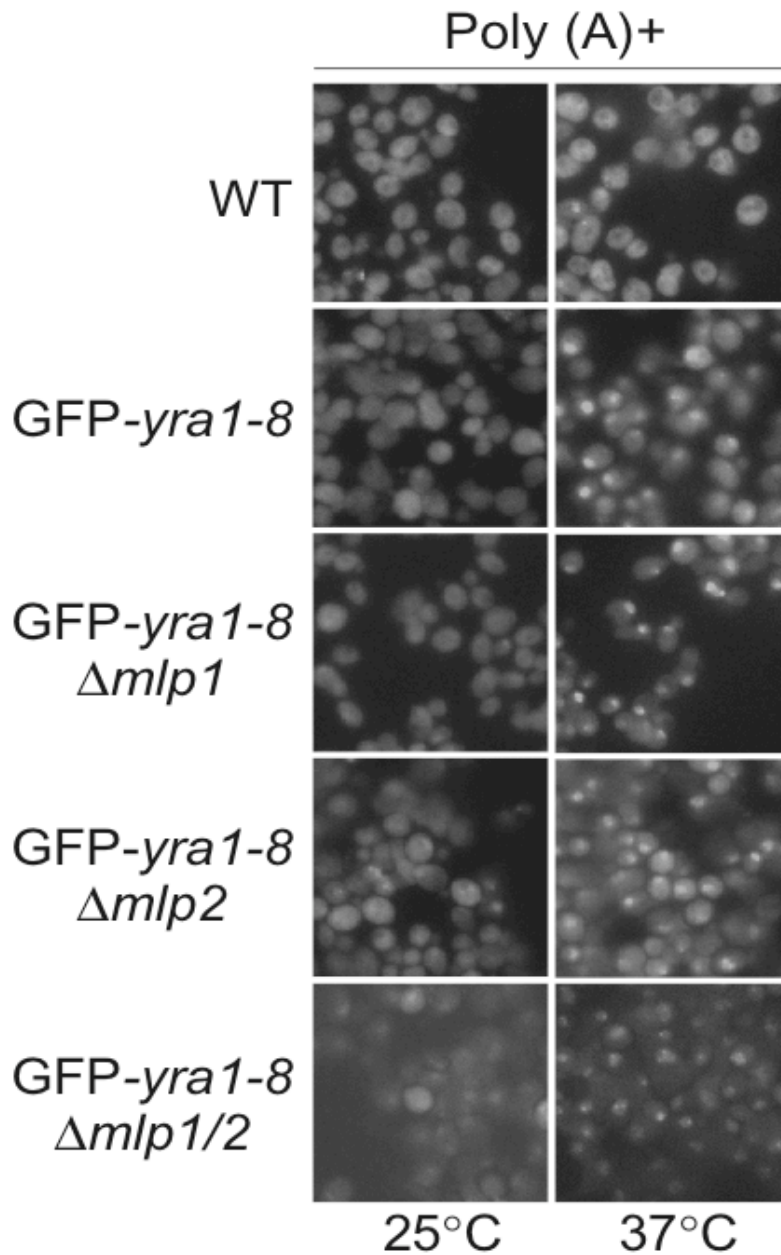

**Loss of Mlp1p or Mlp2p does not rescue the poly (A)+ RNA export defect of the GFP-*yra1-8* mutant strain.** Wild-type, GFP-*yra1-8*, GFP-*yra1-8*  $\Delta mlp1$ , GFP-*yra1-8*  $\Delta mlp2$  or GFP-*yra1-8*  $\Delta mlp1/2$  were grown at 25°C and either kept at 25°C or shifted to 37°C for 1h. After fixation, the distribution of poly(A)+ RNA was examined by in situ hybridization with Cy3-labelled oligodT<sub>(55)</sub>.

Supplementary Figure 2 Vinciguerra et al.

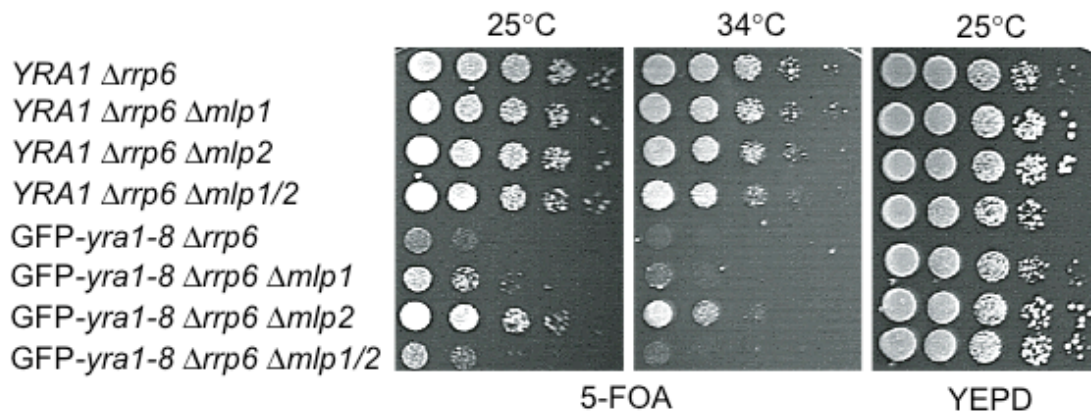

**The synthetic interaction between GFP-*yra1-8* and  $\Delta rrp6$  is alleviated in the context of  $\Delta mlp2$ ,  $\Delta mlp1$  or  $\Delta mlp1/2$ .** The YRA1 shuffle strain (*yra1::HIS3*, pURA3-YRA1) as such or deleted for *RRP6* and combined with  $\Delta mlp1$ ,  $\Delta mlp2$  or  $\Delta mlp1/2$  was transformed with wild-type *YRA1* or the GFP-*yra1-8* plasmids. Transformants were grown in selective medium and 10-fold dilutions spotted on YEPD to control for cell number or on 5-FOA to select against the wild-type pURA3-YRA1 plasmid. Plates were incubated for 3 days at 25°C and 34°C.

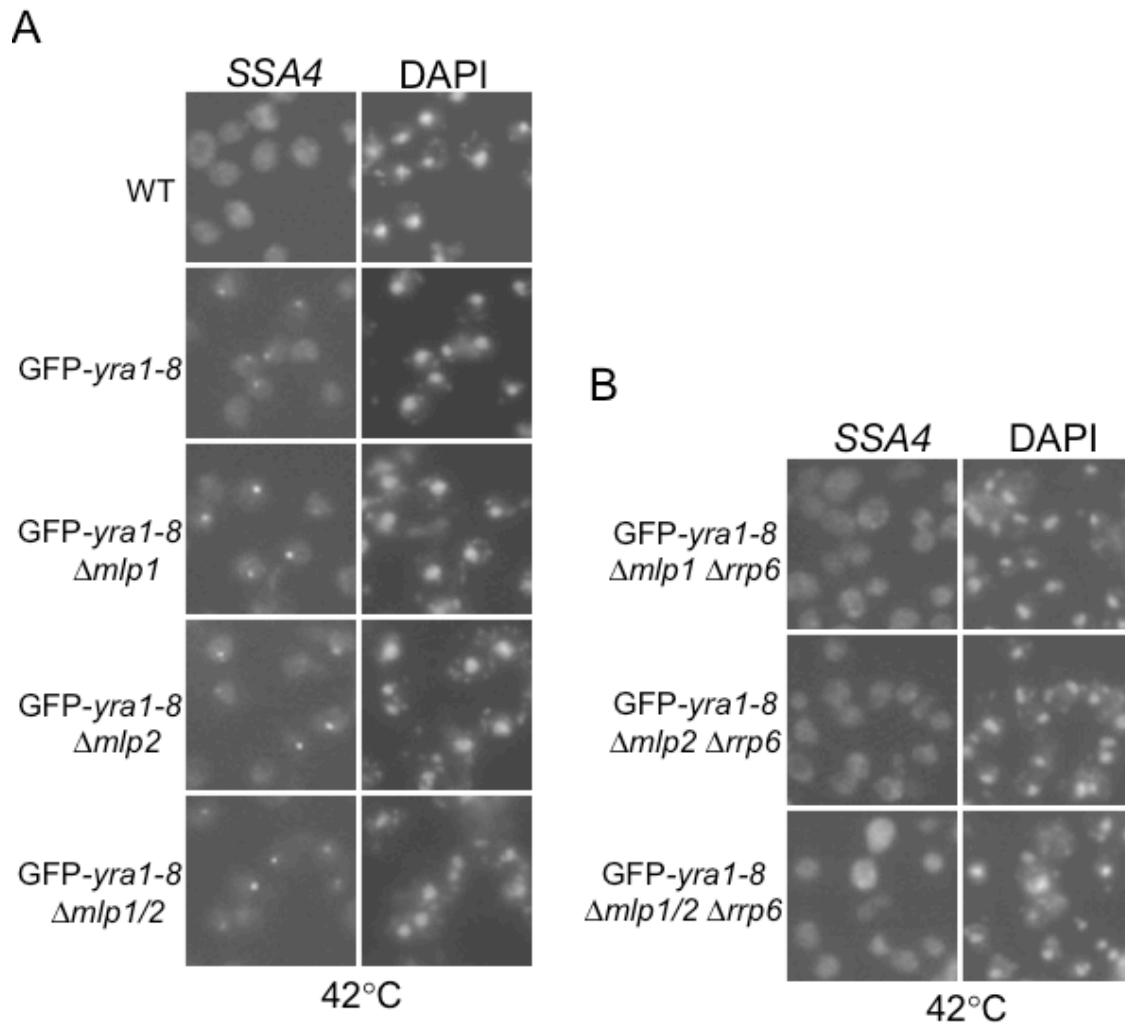

**Loss of Mlp1p, Mlp2p or both in GFP-*yra1-8* does not suppress accumulation of newly synthesized *SSA4* heat shock transcripts within nuclear foci.** (A) Wild-type *YRA1* or GFP-*yra1-8* strains in combination with  $\Delta mlp1$ ,  $\Delta mlp2$  or  $\Delta mlp1/2$  were shifted to 42°C for 30 min. After fixation, the distribution of *SSA4* transcripts was examined by in situ hybridization with Cy3-labelled oligonucleotide probes specific for *SSA4*. (B) The accumulation of *SSA4* transcripts in nuclear foci depends on Rrp6p. *RRP6* was deleted in the above-mentioned GFP-*yra1-8* $\Delta mlp1$ , GFP-*yra1-8* $\Delta mlp2$  and GFP-*yra1-8* $\Delta mlp1/2$  strains. Cells were shifted to 42°C for 30 min and processed as described in (A).

Supplementary Table I Vinciguerra et al.

| no | affymetrix code | med log ratio              | expression level |                           |                    |                                         | expression level (% of YRA1) |                           |                    |                                         |
|----|-----------------|----------------------------|------------------|---------------------------|--------------------|-----------------------------------------|------------------------------|---------------------------|--------------------|-----------------------------------------|
|    |                 | GFP- <i>yra1-8</i> vs YRA1 | YRA1             | YRA1 $\Delta$ <i>mlp2</i> | GFP- <i>yra1-8</i> | GFP- <i>yra1-8</i> $\Delta$ <i>mlp2</i> | YRA1                         | YRA1 $\Delta$ <i>mlp2</i> | GFP- <i>yra1-8</i> | GFP- <i>yra1-8</i> $\Delta$ <i>mlp2</i> |
| 1  | 10400_at        | -3.34                      | 1.85             | 0.6                       | 0.05               | 0.6                                     | 100                          | 32.4                      | 2.7                | 32.4                                    |
| 2  | 7044_at         | -1.28                      | 3.55             | 2.55                      | 0.95               | 3.95                                    | 100                          | 71.8                      | 26.8               | 111.3                                   |
| 3  | 7895_at         | -1.49                      | 4.35             | 3.95                      | 1.35               | 5.15                                    | 100                          | 90.8                      | 31.0               | 118.4                                   |
| 4  | 8050_at         | -2.03                      | 3.6              | 3.3                       | 0.7                | 2.65                                    | 100                          | 91.7                      | 19.4               | 73.6                                    |
| 5  | 5414_i_at       | -4.93                      | 1.4              | 0.05                      | 0.05               | 0.15                                    | 100                          | 3.6                       | 3.6                | 10.7                                    |
| 6  | 5216_at         | -1.72                      | 147.55           | 130.75                    | 37.45              | 112.25                                  | 100                          | 88.6                      | 25.4               | 76.1                                    |
| 7  | 10399_at        | -1.66                      | 4.9              | 4.1                       | 1.25               | 3.3                                     | 100                          | 83.7                      | 25.5               | 67.3                                    |
| 8  | 9280_at         | -1.69                      | 4.65             | 6                         | 1.4                | 3.6                                     | 100                          | 129.0                     | 30.1               | 77.4                                    |
| 9  | 8785_at         | -2.38                      | 2.4              | 2.45                      | 0.5                | 1.25                                    | 100                          | 102.1                     | 20.8               | 52.1                                    |
| 10 | 5330_at         | -2.18                      | 8.5              | 7.05                      | 2.4                | 5.95                                    | 100                          | 82.9                      | 28.2               | 70.0                                    |
| 11 | 9232_at         | -2.2                       | 3.2              | 3.55                      | 0.8                | 1.9                                     | 100                          | 110.9                     | 25.0               | 59.4                                    |
| 12 | 5323_at         | -1.31                      | 94.4             | 114.6                     | 32.15              | 72.85                                   | 100                          | 121.4                     | 34.1               | 77.2                                    |
| 13 | 9640_at         | -1.27                      | 5.65             | 4                         | 2.1                | 4.75                                    | 100                          | 70.8                      | 37.2               | 84.1                                    |
| 14 | 5177_at         | -1.58                      | 7.75             | 7.55                      | 2.25               | 5                                       | 100                          | 97.4                      | 29.0               | 64.5                                    |
| 15 | 9554_at         | -2.05                      | 8.95             | 7.15                      | 1.95               | 4                                       | 100                          | 79.9                      | 21.8               | 44.7                                    |
| 16 | 11240_s_at      | -1.95                      | 4.05             | 0.65                      | 1.45               | 2.9                                     | 100                          | 16.0                      | 35.8               | 71.6                                    |
| 17 | 2605_s_at       | -1.63                      | 92.8             | 66.35                     | 30.4               | 60.35                                   | 100                          | 71.5                      | 32.8               | 65.0                                    |
| 18 | 10809_g_at      | -1.5                       | 10.4             | 12.1                      | 3.4                | 6.55                                    | 100                          | 116.3                     | 32.7               | 63.0                                    |
| 19 | 4224_at         | -1.4                       | 12.2             | 10.35                     | 4.25               | 8.05                                    | 100                          | 84.8                      | 34.8               | 66.0                                    |
| 20 | 11273_at        | -1.96                      | 9.1              | 10.6                      | 2.7                | 5.05                                    | 100                          | 116.5                     | 29.7               | 55.5                                    |
| 21 | 8915_at         | -1.16                      | 37               | 41.35                     | 14.3               | 26.65                                   | 100                          | 111.8                     | 38.6               | 72.0                                    |
| 22 | 5683_at         | -1.22                      | 13.3             | 7.95                      | 4.45               | 8.2                                     | 100                          | 59.8                      | 33.5               | 61.7                                    |
| 23 | 11276_at        | -2.35                      | 4                | 0.6                       | 0.9                | 1.65                                    | 100                          | 15.0                      | 22.5               | 41.3                                    |
| 24 | 9866_i_at       | -1.41                      | 6.95             | 3.3                       | 1.8                | 3.25                                    | 100                          | 47.5                      | 25.9               | 46.8                                    |
| 25 | 2233_at         | -1.47                      | 8.85             | 5.6                       | 3.55               | 6.4                                     | 100                          | 63.3                      | 40.1               | 72.3                                    |
| 26 | 4582_at         | -1.49                      | 74.3             | 54.05                     | 26.4               | 47.5                                    | 100                          | 72.7                      | 35.5               | 63.9                                    |
| 27 | 8153_at         | -1.84                      | 22.15            | 15.95                     | 6.7                | 12.05                                   | 100                          | 72.0                      | 30.2               | 54.4                                    |
| 28 | 2606_s_at       | -1.82                      | 268.1            | 176.3                     | 84.65              | 151.75                                  | 100                          | 65.8                      | 31.6               | 56.6                                    |
| 29 | 10689_at        | -2.35                      | 796.6            | 531.1                     | 201.15             | 358.65                                  | 100                          | 66.7                      | 25.3               | 45.0                                    |
| 30 | 4641_s_at       | -1.31                      | 11.75            | 10                        | 4.6                | 8.2                                     | 100                          | 85.1                      | 39.1               | 69.8                                    |
| 31 | 8753_at         | -1.79                      | 5.15             | 2.4                       | 2.05               | 3.65                                    | 100                          | 46.6                      | 39.8               | 70.9                                    |
| 32 | 3808_s_at       | -1.21                      | 298.75           | 235.3                     | 114.8              | 203.9                                   | 100                          | 78.8                      | 38.4               | 68.3                                    |
| 33 | 7821_at         | -1.43                      | 15.85            | 13.6                      | 5.6                | 9.9                                     | 100                          | 85.8                      | 35.3               | 62.5                                    |
| 34 | 5413_at         | -1.19                      | 202.65           | 204.3                     | 75.65              | 133.05                                  | 100                          | 100.8                     | 37.3               | 65.7                                    |
| 35 | 5382_at         | -1.17                      | 149.3            | 127.75                    | 64.8               | 112.6                                   | 100                          | 85.6                      | 43.4               | 75.4                                    |
| 36 | 2184_s_at       | -1.13                      | 132.7            | 133.1                     | 61.05              | 105.4                                   | 100                          | 100.3                     | 46.0               | 79.4                                    |
| 37 | 11079_at        | -1.43                      | 134.6            | 123.7                     | 36.7               | 62.45                                   | 100                          | 91.9                      | 27.3               | 46.4                                    |
| 38 | 4431_at         | -2.28                      | 6.55             | 3.1                       | 1.6                | 2.7                                     | 100                          | 47.3                      | 24.4               | 41.2                                    |
| 39 | 7546_at         | -1                         | 65.55            | 65.5                      | 33.45              | 55.7                                    | 100                          | 99.9                      | 51.0               | 85.0                                    |
| 40 | 7828_at         | -1.62                      | 349.15           | 358.7                     | 107.4              | 178.7                                   | 100                          | 102.7                     | 30.8               | 51.2                                    |
| 41 | 4430_at         | -3.26                      | 417.8            | 249.5                     | 33.9               | 55.65                                   | 100                          | 59.7                      | 8.1                | 13.3                                    |
| 42 | 7290_at         | -1.41                      | 958.35           | 657.35                    | 346.1              | 564.7                                   | 100                          | 68.6                      | 36.1               | 58.9                                    |
| 43 | 9575_at         | -1.46                      | 34.95            | 25.9                      | 10.6               | 17.25                                   | 100                          | 74.1                      | 30.3               | 49.4                                    |
| 44 | 5929_at         | -1.29                      | 10.25            | 10.85                     | 5.45               | 8.85                                    | 100                          | 105.9                     | 53.2               | 86.3                                    |
| 45 | 7499_at         | -1.09                      | 25.15            | 14.05                     | 10.9               | 17.3                                    | 100                          | 55.9                      | 43.3               | 68.8                                    |
| 46 | 7973_at         | -1.23                      | 848.55           | 600.3                     | 351.05             | 556.75                                  | 100                          | 70.7                      | 41.4               | 65.6                                    |
| 47 | 10294_at        | -1.48                      | 12.4             | 8.9                       | 4.45               | 7.05                                    | 100                          | 71.8                      | 35.9               | 56.9                                    |
| 48 | 3204_at         | -1.07                      | 20.3             | 13.25                     | 6.25               | 9.85                                    | 100                          | 65.3                      | 30.8               | 48.5                                    |
| 49 | 5089_at         | -1.03                      | 12.4             | 12                        | 5.9                | 9.2                                     | 100                          | 96.8                      | 47.6               | 74.2                                    |
| 50 | 7547_at         | -1                         | 17.55            | 19.95                     | 9.95               | 15.45                                   | 100                          | 113.7                     | 56.7               | 88.0                                    |
| 51 | 2607_s_at       | -1.11                      | 819.5            | 703                       | 366.35             | 563.45                                  | 100                          | 85.8                      | 44.7               | 68.8                                    |
| 52 | 8173_at         | -1.07                      | 437.35           | 419.5                     | 213.95             | 327.25                                  | 100                          | 95.9                      | 48.9               | 74.8                                    |
| 53 | 10623_at        | -1.33                      | 156.85           | 106                       | 57.75              | 87.5                                    | 100                          | 67.6                      | 36.8               | 55.8                                    |
| 54 | 6896_at         | -1.66                      | 232              | 200.8                     | 82.3               | 124.55                                  | 100                          | 86.6                      | 35.5               | 53.7                                    |
| 55 | 7075_at         | -1.29                      | 8.85             | 7.2                       | 4.05               | 6.1                                     | 100                          | 81.4                      | 45.8               | 68.9                                    |
| 56 | 8864_at         | -1.25                      | 951.4            | 817.6                     | 379.45             | 569.35                                  | 100                          | 85.9                      | 39.9               | 59.8                                    |
| 57 | 8444_at         | -1.08                      | 32.3             | 27.35                     | 16.15              | 24.2                                    | 100                          | 84.7                      | 50.0               | 74.9                                    |
| 58 | 11181_at        | -1.07                      | 108.7            | 109.2                     | 46.4               | 69.5                                    | 100                          | 100.5                     | 42.7               | 63.9                                    |
| 59 | 11369_at        | -1.01                      | 321.25           | 309.95                    | 158.5              | 236.45                                  | 100                          | 96.5                      | 49.3               | 73.6                                    |
| 60 | 5381_at         | -1.23                      | 104.95           | 75.7                      | 45.6               | 66.95                                   | 100                          | 72.1                      | 43.4               | 63.8                                    |
| 61 | 4009_at         | -1.27                      | 65.5             | 53.55                     | 28.7               | 41.85                                   | 100                          | 81.8                      | 43.8               | 63.9                                    |
| 62 | 3646_s_at       | -2.64                      | 12.45            | 7.9                       | 3.8                | 5.5                                     | 100                          | 63.5                      | 30.5               | 44.2                                    |
| 63 | 9227_i_at       | -1.34                      | 308.35           | 375.55                    | 111.15             | 159.85                                  | 100                          | 121.8                     | 36.0               | 51.8                                    |
| 64 | 5643_at         | -1.06                      | 396.25           | 280.2                     | 173.6              | 248.45                                  | 100                          | 70.7                      | 43.8               | 62.7                                    |
| 65 | 8778_at         | -1.22                      | 11.8             | 9.25                      | 5.25               | 7.5                                     | 100                          | 78.4                      | 44.5               | 63.6                                    |
| 66 | 4028_at         | -1.14                      | 10.1             | 8.2                       | 3.75               | 5.35                                    | 100                          | 81.2                      | 37.1               | 53.0                                    |
| 67 | 4451_at         | -1.22                      | 69.4             | 53.7                      | 30.65              | 43.5                                    | 100                          | 77.4                      | 44.2               | 62.7                                    |
| 68 | 8186_at         | -1.29                      | 90.35            | 76.7                      | 39.45              | 54.4                                    | 100                          | 84.9                      | 43.7               | 60.2                                    |



| GFP- <i>yra1-8</i> $\Delta$ <i>mlp2</i> /<br>GFP- <i>yra1-8</i> |                                                                                 |
|-----------------------------------------------------------------|---------------------------------------------------------------------------------|
| 12.00                                                           | non-annotated SAGE orf Found forward in NC_001143 between 173981 and 174175     |
| 4.16                                                            | non-annotated SAGE orf Found reverse in NC_001134 between 164788 and 164997     |
| 3.81                                                            | <i>SPO19</i> YPL130W                                                            |
| 3.79                                                            | non-annotated SAGE orf Found forward in NC_001147 between 1071000 and 1071164 w |
| 3.00                                                            | CEN5 Centromere                                                                 |
| 3.00                                                            | <i>MIG2</i> YGL209W                                                             |
| 2.64                                                            | non-annotated SAGE orf Found reverse in NC_001143 between 137683 and 137847     |
| 2.57                                                            | non-annotated SAGE orf Found reverse in NC_001145 between 433097 and 433231     |
| 2.50                                                            | <i>CPD1</i> YNR074C                                                             |
| 2.48                                                            | YFR032C                                                                         |
| 2.38                                                            | non-annotated SAGE orf Found forward in NC_001145 between 733313 and 733531     |
| 2.27                                                            | YFR026C                                                                         |
| 2.26                                                            | YMR018W                                                                         |
| 2.22                                                            | <i>RCK1</i> YGL158W                                                             |
| 2.05                                                            | <i>NAT4</i> YMR069W                                                             |
| 2.00                                                            | non-annotated SAGE orf Found reverse in NC_001133 between 219555 and 219719     |
| 1.99                                                            | chromosome XVI. Found forward in NC_001148 between 111147 and 112146            |
| 1.93                                                            | non-annotated SAGE orf Found forward in NC_001142 between 471954 and 472142     |
| 1.89                                                            | <i>CSM2</i> YIL132C                                                             |
| 1.87                                                            | non-annotated SAGE orf Found forward in NC_001133 between 73444 and 73614       |
| 1.86                                                            | <i>RNH35</i> YNL072W                                                            |
| 1.84                                                            | <i>MIG3</i> YER028C                                                             |
| 1.83                                                            | non-annotated SAGE orf Found reverse in NC_001133 between 3170 and 3394         |
| 1.81                                                            | <i>BSC3</i> YLR465C                                                             |
| 1.80                                                            | chromosome VI. Found forward in NC_001138 between 73614 and 74613               |
| 1.80                                                            | YHL026C                                                                         |
| 1.80                                                            | non-annotated SAGE orf Found forward in NC_001147 between 33183 and 33335       |
| 1.79                                                            | chromosome XVI. Found forward in NC_001148 between 112147 and 113146            |
| 1.78                                                            | <i>CWP1</i> YKL096W                                                             |
| 1.78                                                            | non-annotated SAGE orf Found forward in NC_001139 between 319845 and 319982     |
| 1.78                                                            | non-annotated SAGE orf Found forward in NC_001146 between 547109 and 547366     |
| 1.78                                                            | RDN37-1 35S ribosomal RNA                                                       |
| 1.77                                                            | YPL068C                                                                         |
| 1.76                                                            | RPR1 RNase P RNA                                                                |
| 1.74                                                            | YFL006W                                                                         |
| 1.73                                                            | chromosome VII. Found forward in NC_001139 between 138050 and 139047            |
| 1.70                                                            | <i>PRY3</i> YJL078C                                                             |
| 1.69                                                            | YHR095W                                                                         |
| 1.67                                                            | <i>OPT2</i> YPR194C                                                             |
| 1.66                                                            | <i>ALD6</i> YPL061W                                                             |
| 1.64                                                            | <i>HXT1</i> YHR094C                                                             |
| 1.63                                                            | <i>TIP1</i> YBR067C                                                             |
| 1.63                                                            | <i>ARG80</i> YMR042W                                                            |
| 1.62                                                            | non-annotated SAGE orf Found reverse in NC_001136 between 340810 and 340977     |
| 1.59                                                            | non-annotated SAGE orf Found reverse in NC_001148 between 678411 and 678614     |
| 1.59                                                            | <i>FAS2</i> YPL231W                                                             |
| 1.58                                                            | YLR042C                                                                         |
| 1.58                                                            | YHRCDELTA4                                                                      |
| 1.56                                                            | <i>PUS2</i> YGL063W                                                             |
| 1.55                                                            | YPR195C                                                                         |
| 1.54                                                            | chromosome XVI. Found forward in NC_001148 between 113147 and 113815            |
| 1.53                                                            | <i>ALD4</i> YOR374W                                                             |
| 1.52                                                            | <i>MAE1</i> YKL029C                                                             |
| 1.51                                                            | <i>GFD2</i> YCL036W                                                             |
| 1.51                                                            | YBR219C                                                                         |
| 1.50                                                            | <i>ACC1</i> YNR016C                                                             |
| 1.50                                                            | <i>RGS2</i> YOR107W                                                             |
| 1.50                                                            | <i>FAR1</i> YJL157C                                                             |
| 1.49                                                            | <i>CLN3</i> YAL040C                                                             |
| 1.47                                                            | <i>BLM3</i> YFL007W                                                             |
| 1.46                                                            | non-annotated SAGE orf Found forward in NC_001141 between 26990 and 27169       |
| 1.45                                                            | <i>YRF1-6</i> YNL339C                                                           |
| 1.44                                                            | non-annotated SAGE orf Found reverse in NC_001145 between 671528 and 671701     |
| 1.43                                                            | <i>RNR1</i> YER070W                                                             |
| 1.43                                                            | YNR066C                                                                         |
| 1.43                                                            | non-annotated SAGE orf Found reverse in NC_001141 between 231169 and 231306     |
| 1.42                                                            | <i>TRM5</i> YHR070W                                                             |
| 1.38                                                            | YOR342C                                                                         |

|     |           |       |        |         |        |        |     |       |      |      |
|-----|-----------|-------|--------|---------|--------|--------|-----|-------|------|------|
| 69  | 5184_at   | -1.05 | 106.35 | 91.5    | 56.4   | 77.7   | 100 | 86.0  | 53.0 | 73.1 |
| 70  | 9796_at   | -1.72 | 49.35  | 43.65   | 15.7   | 21.6   | 100 | 88.4  | 31.8 | 43.8 |
| 71  | 3762_s_at | -1.39 | 183.05 | 163.3   | 74.9   | 102.75 | 100 | 89.2  | 40.9 | 56.1 |
| 72  | 10831_s_a | -1.12 | 30.3   | 28.55   | 14.5   | 19.85  | 100 | 94.2  | 47.9 | 65.5 |
| 73  | 10391_at  | -1.23 | 147.95 | 119.35  | 64.7   | 88.35  | 100 | 80.7  | 43.7 | 59.7 |
| 74  | 4019_at   | -1.38 | 16.8   | 14.05   | 7.95   | 10.75  | 100 | 83.6  | 47.3 | 64.0 |
| 75  | 11101_at  | -1.33 | 33.85  | 35.5    | 13.95  | 18.85  | 100 | 104.9 | 41.2 | 55.7 |
| 76  | 8713_at   | -1.64 | 16.65  | 14.35   | 6.7    | 9.05   | 100 | 86.2  | 40.2 | 54.4 |
| 77  | 7346_at   | -1.12 | 7.9    | 8.1     | 4      | 5.4    | 100 | 102.5 | 50.6 | 68.4 |
| 78  | 4600_at   | -1.74 | 27.6   | 28.2    | 9.75   | 13.15  | 100 | 102.2 | 35.3 | 47.6 |
| 79  | 9229_i_at | -1.04 | 8.85   | 5.15    | 3.9    | 5.25   | 100 | 58.2  | 44.1 | 59.3 |
| 80  | 8981_at   | -1.15 | 443    | 405.1   | 183.65 | 246.2  | 100 | 91.4  | 41.5 | 55.6 |
| 81  | 6906_at   | -1.18 | 18.8   | 15.15   | 8.15   | 10.9   | 100 | 80.6  | 43.4 | 58.0 |
| 82  | 8922_at   | -1.14 | 466.2  | 369.2   | 200.9  | 265.8  | 100 | 79.2  | 43.1 | 57.0 |
| 83  | 10282_at  | -1.11 | 152.25 | 132     | 88.2   | 116.2  | 100 | 86.7  | 57.9 | 76.3 |
| 84  | 3718_s_at | -1.33 | 996.7  | 726.85  | 440.5  | 577.55 | 100 | 72.9  | 44.2 | 57.9 |
| 85  | 9293_at   | -1.25 | 91.35  | 123.35  | 40.9   | 53.45  | 100 | 135.0 | 44.8 | 58.5 |
| 86  | 8726_at   | -2.19 | 148.05 | 277.05  | 31.6   | 41.2   | 100 | 187.1 | 21.3 | 27.8 |
| 87  | 4942_at   | -1.06 | 149.8  | 126.3   | 76.55  | 99.65  | 100 | 84.3  | 51.1 | 66.5 |
| 88  | 6373_g_at | -1.09 | 167.5  | 145.2   | 81.65  | 106.2  | 100 | 86.7  | 48.7 | 63.4 |
| 89  | 3114_s_at | -1.15 | 72.2   | 48.75   | 37.2   | 48.1   | 100 | 67.5  | 51.5 | 66.6 |
| 90  | 9020_at   | -1.32 | 10.8   | 10.9    | 3.7    | 4.75   | 100 | 100.9 | 34.3 | 44.0 |
| 91  | 7015_at   | -1.16 | 10.65  | 8.25    | 5.65   | 7.25   | 100 | 77.5  | 53.1 | 68.1 |
| 92  | 5173_at   | -1.21 | 10.9   | 8.05    | 4.45   | 5.7    | 100 | 73.9  | 40.8 | 52.3 |
| 93  | 5758_at   | -1.15 | 44.4   | 33.25   | 19.15  | 24.5   | 100 | 74.9  | 43.1 | 55.2 |
| 94  | 2253_s_at | -1.27 | 724.2  | 1061.65 | 328.05 | 419.55 | 100 | 146.6 | 45.3 | 57.9 |
| 95  | 10895_at  | -1.09 | 21.5   | 16.6    | 9.45   | 12.05  | 100 | 77.2  | 44.0 | 56.0 |
| 96  | 10471_at  | -1.48 | 75     | 68.75   | 33.05  | 41.9   | 100 | 91.7  | 44.1 | 55.9 |
| 97  | 10778_at  | -1    | 405    | 410.05  | 200.4  | 252.05 | 100 | 101.2 | 49.5 | 62.2 |
| 98  | 4477_at   | -1.09 | 27.65  | 21.1    | 11.8   | 14.8   | 100 | 76.3  | 42.7 | 53.5 |
| 99  | 7601_at   | -1.23 | 16.4   | 16.75   | 7.1    | 8.9    | 100 | 102.1 | 43.3 | 54.3 |
| 100 | 5841_at   | -1.08 | 6.65   | 6       | 2.6    | 3.25   | 100 | 90.2  | 39.1 | 48.9 |
| 101 | 2604_s_at | -1.8  | 14.9   | 8.25    | 5.6    | 7      | 100 | 55.4  | 37.6 | 47.0 |
| 102 | 10382_at  | -1    | 241.05 | 222.6   | 117.35 | 146.35 | 100 | 92.3  | 48.7 | 60.7 |
| 103 | 4164_at   | -1.28 | 739.15 | 601.9   | 308.7  | 384.45 | 100 | 81.4  | 41.8 | 52.0 |
| 104 | 8477_at   | -1.09 | 61.95  | 51.95   | 31.05  | 38.65  | 100 | 83.9  | 50.1 | 62.4 |
| 105 | 8185_at   | -1    | 349.25 | 272.95  | 167.15 | 207.5  | 100 | 78.2  | 47.9 | 59.4 |
| 106 | 10818_at  | -1.12 | 15.4   | 8.55    | 5.65   | 7      | 100 | 55.5  | 36.7 | 45.5 |
| 107 | 5029_at   | -1.89 | 3.4    | 1.45    | 0.85   | 1.05   | 100 | 42.6  | 25.0 | 30.9 |
| 108 | 8721_at   | -1.43 | 6      | 5.3     | 2.35   | 2.9    | 100 | 88.3  | 39.2 | 48.3 |
| 109 | 2252_g_at | -1.17 | 933.05 | 1166.5  | 413.7  | 509.6  | 100 | 125.0 | 44.3 | 54.6 |
| 110 | 8730_g_at | -1.45 | 457.9  | 488.25  | 173.5  | 211.75 | 100 | 106.6 | 37.9 | 46.2 |
| 111 | 7476_at   | -1.57 | 41.9   | 33.35   | 14.25  | 17.35  | 100 | 79.6  | 34.0 | 41.4 |
| 112 | 9967_at   | -1.82 | 27.15  | 23.35   | 8.95   | 10.85  | 100 | 86.0  | 33.0 | 40.0 |
| 113 | 5807_at   | -1.39 | 223.2  | 155.65  | 78.6   | 95.15  | 100 | 69.7  | 35.2 | 42.6 |
| 114 | 3115_at   | -1.55 | 7.95   | 2.05    | 3.35   | 4.05   | 100 | 25.8  | 42.1 | 50.9 |
| 115 | 10758_at  | -1.03 | 20.95  | 23.2    | 9.65   | 11.65  | 100 | 110.7 | 46.1 | 55.6 |
| 116 | 4660_i_at | -1.01 | 13.95  | 7.9     | 7.25   | 8.7    | 100 | 56.6  | 52.0 | 62.4 |
| 117 | 5465_f_at | -1.36 | 107.2  | 70.55   | 35.1   | 42     | 100 | 65.8  | 32.7 | 39.2 |
| 118 | 7609_at   | -1.03 | 28.1   | 24.15   | 13.55  | 16.15  | 100 | 85.9  | 48.2 | 57.5 |
| 119 | 9189_at   | -1.22 | 245.45 | 264.05  | 110.4  | 131.3  | 100 | 107.6 | 45.0 | 53.5 |
| 120 | 3834_s_at | -1.33 | 276.55 | 174     | 104.8  | 124.45 | 100 | 62.9  | 37.9 | 45.0 |
| 121 | 4324_s_at | -1.13 | 270.8  | 218.35  | 131.65 | 156.3  | 100 | 80.6  | 48.6 | 57.7 |
| 122 | 4534_at   | -1.05 | 55.55  | 52.3    | 22.25  | 26.4   | 100 | 94.1  | 40.1 | 47.5 |
| 123 | 7932_at   | -1.08 | 104.1  | 117.95  | 54.6   | 64.75  | 100 | 113.3 | 52.4 | 62.2 |
| 124 | 5600_at   | -1.25 | 86.2   | 66.25   | 38.85  | 46     | 100 | 76.9  | 45.1 | 53.4 |
| 125 | 10292_at  | -1.22 | 30.55  | 28.5    | 14.5   | 17.1   | 100 | 93.3  | 47.5 | 56.0 |
| 126 | 5467_f_at | -1.19 | 893.05 | 934.9   | 366.5  | 430.9  | 100 | 104.7 | 41.0 | 48.3 |
| 127 | 4832_at   | -1.37 | 96.5   | 102.9   | 38.25  | 44.95  | 100 | 106.6 | 39.6 | 46.6 |
| 128 | 2183_s_at | -1.26 | 77.15  | 59.9    | 32.4   | 37.95  | 100 | 77.6  | 42.0 | 49.2 |
| 129 | 6980_at   | -1.49 | 13.2   | 12.3    | 4.4    | 5.15   | 100 | 93.2  | 33.3 | 39.0 |
| 130 | 10877_at  | -1    | 52.45  | 50.8    | 29.45  | 34.45  | 100 | 96.9  | 56.1 | 65.7 |
| 131 | 9192_at   | -1.88 | 23.35  | 15.1    | 3.85   | 4.5    | 100 | 64.7  | 16.5 | 19.3 |
| 132 | 5116_at   | -1.16 | 235.95 | 246.45  | 115.65 | 134.3  | 100 | 104.5 | 49.0 | 56.9 |
| 133 | 4392_at   | -1.24 | 668.6  | 673.45  | 263.25 | 305.25 | 100 | 100.7 | 39.4 | 45.7 |
| 134 | 10662_at  | -1.02 | 49.6   | 44.2    | 25.45  | 29.3   | 100 | 89.1  | 51.3 | 59.1 |
| 135 | 2947_s_at | -1.16 | 71     | 41.4    | 32.85  | 37.75  | 100 | 58.3  | 46.3 | 53.2 |
| 136 | 9998_at   | -1    | 6.6    | 8.8     | 4.05   | 4.65   | 100 | 133.3 | 61.4 | 70.5 |
| 137 | 8775_at   | -1.28 | 6.25   | 4.3     | 3.4    | 3.9    | 100 | 68.8  | 54.4 | 62.4 |
| 138 | 5922_s_at | -1.02 | 146.25 | 119.3   | 75.6   | 85.2   | 100 | 81.6  | 51.7 | 58.3 |
| 139 | 9236_at   | -1.21 | 67     | 90.35   | 29.1   | 32.75  | 100 | 134.9 | 43.4 | 48.9 |
| 140 | 10583_at  | -1.01 | 718.05 | 505.85  | 366.45 | 412.3  | 100 | 70.4  | 51.0 | 57.4 |
| 141 | 10763_at  | -1.15 | 47.45  | 39.15   | 22.7   | 25.4   | 100 | 82.5  | 47.8 | 53.5 |

|      |               |                                                                                                    |
|------|---------------|----------------------------------------------------------------------------------------------------|
| 1.38 | <i>GCN1</i>   | YGL195W                                                                                            |
| 1.38 |               | SNR55 snRNA                                                                                        |
| 1.37 |               | chromosome XII, complete chromosome sequence. Found forward in NC_001144 between 941478 and 942778 |
| 1.37 |               | non-annotated SAGE orf Found reverse in NC_001142 between 731735 and 731896                        |
| 1.37 | <i>VPS13</i>  | YLL040C                                                                                            |
| 1.35 |               | non-annotated SAGE orf Found reverse in NC_001141 between 385816 and 385959                        |
| 1.35 | <i>ZAP1</i>   | YJL056C                                                                                            |
| 1.35 |               | SNR19 snRNA                                                                                        |
| 1.35 |               | YBR032W                                                                                            |
| 1.35 |               | non-annotated SAGE orf Found forward in NC_001139 between 1012179 and 1012379                      |
| 1.35 |               | non-annotated SAGE orf Found forward in NC_001145 between 733267 and 733455                        |
| 1.34 | <i>RPS7B</i>  | YNL096C                                                                                            |
| 1.34 | <i>FRM2</i>   | YCL026C-A                                                                                          |
| 1.32 | <i>SUN4</i>   | YNL066W                                                                                            |
| 1.32 |               | YLR073C                                                                                            |
| 1.31 |               | chromosome XII, complete chromosome sequence. Found forward in NC_001144 between 942777 and 946791 |
| 1.31 | <i>HUG1</i>   | YML058w-a                                                                                          |
| 1.30 | <i>ZPS1</i>   | YOL154W                                                                                            |
| 1.30 | <i>ADE6</i>   | YGR061C                                                                                            |
| 1.30 | <i>DNF2</i>   | YDR093W                                                                                            |
| 1.29 |               | chromosome X, complete chromosome sequence. Found forward in NC_001142 between 15138 and 15624     |
| 1.28 | <i>ALF1</i>   | YNL148C                                                                                            |
| 1.28 |               | non-annotated SAGE orf Found reverse in NC_001134 between 143662 and 143892                        |
| 1.28 | <i>SUT1</i>   | YGL162W                                                                                            |
| 1.28 | <i>MCM3</i>   | YEL032W                                                                                            |
| 1.28 |               | chromosome VII, complete chromosome sequence. Found forward in NC_001139 between 21307 and 21608   |
| 1.28 | <i>HMS2</i>   | YJR147W                                                                                            |
| 1.27 | <i>SRP40</i>  | YKR092C                                                                                            |
| 1.26 | <i>ASH1</i>   | YKL185W                                                                                            |
| 1.25 |               | YHR048W                                                                                            |
| 1.25 |               | YPR157W                                                                                            |
| 1.25 |               | non-annotated SAGE orf Found forward in NC_001136 between 1022913 and 1023059                      |
| 1.25 |               | chromosome XVI, complete chromosome sequence. Found forward in NC_001148 between 110147 and 111146 |
| 1.25 | <i>YBT1</i>   | YLL048C                                                                                            |
| 1.25 | <i>RHR2</i>   | YIL053W                                                                                            |
| 1.24 | <i>RK11</i>   | YOR095C                                                                                            |
| 1.24 | <i>RPA190</i> | YOR341W                                                                                            |
| 1.24 |               | non-annotated SAGE orf Found forward in NC_001142 between 322217 and 322453                        |
| 1.24 | <i>HOP2</i>   | YGL033W                                                                                            |
| 1.23 |               | YOL160W                                                                                            |
| 1.23 |               | chromosome VII, complete chromosome sequence. Found forward in NC_001139 between 20307 and 21306   |
| 1.22 |               | non-annotated SAGE orf Found forward in NC_001146 between 89212 and 89394                          |
| 1.22 |               | SNR41 snRNA                                                                                        |
| 1.21 |               | YLR343W                                                                                            |
| 1.21 |               | SNR13 snRNA                                                                                        |
| 1.21 |               | chromosome X, complete chromosome sequence. Found forward in NC_001142 between 41889 and 42888     |
| 1.21 |               | YKL161C                                                                                            |
| 1.20 |               | non-annotated SAGE orf Found forward in NC_001139 between 783944 and 784078                        |
| 1.20 |               | non-annotated SAGE orf Found reverse in NC_001137 between 52351 and 52515                          |
| 1.19 |               | YPR123C                                                                                            |
| 1.19 |               | SNR77 snRNA                                                                                        |
| 1.19 |               | YLL067C                                                                                            |
| 1.19 |               | YHR218W                                                                                            |
| 1.19 | <i>MIP6</i>   | YHR015W                                                                                            |
| 1.19 |               | YPL183C                                                                                            |
| 1.18 | <i>SPR6</i>   | YER115C                                                                                            |
| 1.18 |               | YLR040C                                                                                            |
| 1.18 |               | non-annotated SAGE orf Found reverse in NC_001137 between 52391 and 52549                          |
| 1.18 | <i>ATF2</i>   | YGR177C                                                                                            |
| 1.17 |               | chromosome VII, forward in NC_001139 between 137050 and 138049 with 100% identity.                 |
| 1.17 |               | non-annotated SAGE orf Found reverse in NC_001134 between 376102 and 376293                        |
| 1.17 |               | YJR129C                                                                                            |
| 1.17 |               | SNR74 snRNA                                                                                        |
| 1.16 | <i>SCS3</i>   | YGL126W                                                                                            |
| 1.16 | <i>DSE2</i>   | YHR143W                                                                                            |
| 1.15 | <i>DHR2</i>   | YKL078W                                                                                            |
| 1.15 |               | chromosome XII, complete chromosome sequence. Found forward in NC_001144 between 103543 and 104542 |
| 1.15 | <i>REC102</i> | YLR329W                                                                                            |
| 1.15 |               | non-annotated SAGE orf Found forward in NC_001146 between 89019 and 89186                          |
| 1.13 |               | YDL184w-a                                                                                          |
| 1.13 |               | non-annotated SAGE orf Found forward in NC_001145 between 434355 and 434564                        |
| 1.13 | <i>URA6</i>   | YKL024C                                                                                            |
| 1.12 | <i>TOR2</i>   | YKL203C                                                                                            |

|     |           |       |        |        |        |        |     |       |      |      |
|-----|-----------|-------|--------|--------|--------|--------|-----|-------|------|------|
| 142 | 2591_s_at | -1.25 | 8.7    | 4.9    | 3.85   | 4.3    | 100 | 56.3  | 44.3 | 49.4 |
| 143 | 3187_s_at | -1.38 | 117.75 | 76.1   | 49.8   | 55.5   | 100 | 64.6  | 42.3 | 47.1 |
| 144 | 3737_s_at | -1.46 | 27.45  | 15.7   | 10.75  | 11.95  | 100 | 57.2  | 39.2 | 43.5 |
| 145 | 10526_at  | -1.05 | 73.35  | 52.15  | 36.05  | 40     | 100 | 71.1  | 49.1 | 54.5 |
| 146 | 7762_at   | -1.12 | 269.4  | 204.45 | 123.45 | 135.4  | 100 | 75.9  | 45.8 | 50.3 |
| 147 | 11272_at  | -1.03 | 32.05  | 56.65  | 14.25  | 15.6   | 100 | 176.8 | 44.5 | 48.7 |
| 148 | 5034_at   | -1.32 | 100.9  | 90.4   | 42.6   | 46.5   | 100 | 89.6  | 42.2 | 46.1 |
| 149 | 6725_at   | -2.36 | 53.05  | 47.5   | 8.85   | 9.65   | 100 | 89.5  | 16.7 | 18.2 |
| 150 | 8749_at   | -1.2  | 12     | 7.75   | 4.7    | 5.1    | 100 | 64.6  | 39.2 | 42.5 |
| 151 | 3476_f_at | -1.21 | 41.45  | 40.2   | 20.7   | 22.35  | 100 | 97.0  | 49.9 | 53.9 |
| 152 | 10658_at  | -1    | 85.35  | 77.2   | 41.35  | 44.45  | 100 | 90.5  | 48.4 | 52.1 |
| 153 | 3734_s_at | -1.32 | 35.8   | 25.75  | 18.9   | 20.3   | 100 | 71.9  | 52.8 | 56.7 |
| 154 | 6346_at   | -1.07 | 26.6   | 18.35  | 11.8   | 12.6   | 100 | 69.0  | 44.4 | 47.4 |
| 155 | 4422_at   | -1.07 | 357.9  | 276.9  | 161.2  | 171.95 | 100 | 77.4  | 45.0 | 48.0 |
| 156 | 10203_at  | -1.21 | 80.8   | 79.25  | 39.5   | 41.85  | 100 | 98.1  | 48.9 | 51.8 |
| 157 | 3794_f_at | -1.38 | 56.9   | 44.8   | 23.6   | 25     | 100 | 78.7  | 41.5 | 43.9 |
| 158 | 4385_at   | -1.38 | 9.05   | 7.45   | 2.8    | 2.95   | 100 | 82.3  | 30.9 | 32.6 |
| 159 | 3924_f_at | -1.2  | 52.3   | 44.25  | 24.15  | 25.15  | 100 | 84.6  | 46.2 | 48.1 |
| 160 | 3418_f_at | -1.18 | 55     | 45.65  | 23.25  | 24.15  | 100 | 83.0  | 42.3 | 43.9 |
| 161 | 3361_f_at | -1.31 | 52.35  | 44.15  | 22.8   | 23.4   | 100 | 84.3  | 43.6 | 44.7 |
| 162 | 8285_at   | -1.03 | 23.2   | 20.15  | 11.9   | 12.2   | 100 | 86.9  | 51.3 | 52.6 |
| 163 | 4288_at   | -2.3  | 85     | 87.9   | 20.9   | 21.4   | 100 | 103.4 | 24.6 | 25.2 |
| 164 | 7475_at   | -1.04 | 213.6  | 188.75 | 107.4  | 109.4  | 100 | 88.4  | 50.3 | 51.2 |
| 165 | 3707_f_at | -1.25 | 53     | 41.05  | 24     | 24.4   | 100 | 77.5  | 45.3 | 46.0 |
| 166 | 9203_at   | -1.26 | 357.6  | 286.85 | 147.05 | 146.75 | 100 | 80.2  | 41.1 | 41.0 |
| 167 | 3743_f_at | -1.2  | 73.95  | 43.6   | 34.25  | 34.05  | 100 | 59.0  | 46.3 | 46.0 |
| 168 | 3243_at   | -1.18 | 39.5   | 24.25  | 16     | 15.9   | 100 | 61.4  | 40.5 | 40.3 |
| 169 | 8777_at   | -1.08 | 319.45 | 323.8  | 167.2  | 162.25 | 100 | 101.4 | 52.3 | 50.8 |
| 170 | 4698_at   | -1    | 35.8   | 37.15  | 15.3   | 14.75  | 100 | 103.8 | 42.7 | 41.2 |
| 171 | 3710_f_at | -1.04 | 62     | 42.3   | 32.65  | 31.35  | 100 | 68.2  | 52.7 | 50.6 |
| 172 | 3819_f_at | -1.17 | 75.25  | 43.65  | 35.1   | 33.65  | 100 | 58.0  | 46.6 | 44.7 |
| 173 | 9193_at   | -2.4  | 120.4  | 113.95 | 16.3   | 15.45  | 100 | 94.6  | 13.5 | 12.8 |
| 174 | 3840_f_at | -1.16 | 51.7   | 43     | 23.55  | 22.05  | 100 | 83.2  | 45.6 | 42.6 |
| 175 | 3733_s_at | -1.19 | 24.6   | 13.5   | 10.25  | 9.55   | 100 | 54.9  | 41.7 | 38.8 |
| 176 | 4736_at   | -1.39 | 274.65 | 231.75 | 94.7   | 87.95  | 100 | 84.4  | 34.5 | 32.0 |
| 177 | 3830_f_at | -1.08 | 82.25  | 51     | 44.1   | 40.7   | 100 | 62.0  | 53.6 | 49.5 |
| 178 | 9798_at   | -1.07 | 154.05 | 134.65 | 80.15  | 73.95  | 100 | 87.4  | 52.0 | 48.0 |
| 179 | 8049_at   | -2.48 | 7.15   | 3.95   | 1.85   | 1.7    | 100 | 55.2  | 25.9 | 23.8 |
| 180 | 3885_f_at | -1.3  | 89.35  | 51.15  | 35.5   | 32.1   | 100 | 57.2  | 39.7 | 35.9 |
| 181 | 3113_s_at | -1.41 | 42     | 46.05  | 28.4   | 25.6   | 100 | 109.6 | 67.6 | 61.0 |
| 182 | 5947_at   | -1.17 | 11.2   | 7.45   | 5.85   | 5.25   | 100 | 66.5  | 52.2 | 46.9 |
| 183 | 3514_f_at | -1.04 | 53.5   | 42.9   | 23.75  | 20.85  | 100 | 80.2  | 44.4 | 39.0 |
| 184 | 5412_at   | -1.73 | 6.9    | 5.55   | 2.4    | 2.1    | 100 | 80.4  | 34.8 | 30.4 |
| 185 | 3473_f_at | -1.07 | 78.4   | 51.4   | 38.35  | 32.2   | 100 | 65.6  | 48.9 | 41.1 |
| 186 | 3681_s_at | -1.85 | 3.7    | 2.15   | 1.25   | 1      | 100 | 58.1  | 33.8 | 27.0 |
| 187 | 3688_f_at | -1.01 | 76.9   | 43.5   | 37.65  | 30     | 100 | 56.6  | 49.0 | 39.0 |
| 188 | 5838_at   | -1    | 55.3   | 46.05  | 31.95  | 25.3   | 100 | 83.3  | 57.8 | 45.8 |
| 189 | 9279_at   | -1.07 | 9.45   | 8.5    | 4.1    | 3.2    | 100 | 89.9  | 43.4 | 33.9 |
| 190 | 9762_at   | -1.8  | 532.25 | 557    | 160.6  | 118.55 | 100 | 104.7 | 30.2 | 22.3 |
| 191 | 8115_f_at | -1.13 | 38.85  | 33.25  | 20.65  | 15.2   | 100 | 85.6  | 53.2 | 39.1 |
| 192 | 8783_at   | -1.15 | 4.7    | 1.75   | 2.1    | 1.35   | 100 | 37.2  | 44.7 | 28.7 |
| 193 | 6619_at   | -2.14 | 7.15   | 2.6    | 2.7    | 1.65   | 100 | 36.4  | 37.8 | 23.1 |
| 194 | 10457_at  | -1.08 | 3.95   | 2.5    | 1.65   | 0.8    | 100 | 63.3  | 41.8 | 20.3 |

|      |               |                                                                                                   |
|------|---------------|---------------------------------------------------------------------------------------------------|
| 1.12 |               | chromosome XV, complete chromosome sequence. Found forward in NC_001147 between 962693 and 963692 |
| 1.11 |               | YHL050C                                                                                           |
| 1.11 | <i>YRF1-5</i> | YLR467W                                                                                           |
| 1.11 | <i>DYN1</i>   | YKR054C                                                                                           |
| 1.10 | <i>RPA135</i> | YPR010C                                                                                           |
| 1.09 |               | non-annotated SAGE orf Found reverse in NC_001133 between 222994 and 223152                       |
| 1.09 | <i>SCW11</i>  | YGL028C                                                                                           |
| 1.09 | <i>HO</i>     | YDL227C                                                                                           |
| 1.09 |               | non-annotated SAGE orf Found forward in NC_001146 between 116677 and 116865                       |
| 1.08 |               | TS(AGA)D1 tRNA-Ser                                                                                |
| 1.07 | <i>TEF4</i>   | YKL081W                                                                                           |
| 1.07 | <i>YRF1-4</i> | YLR466W                                                                                           |
| 1.07 |               | YDR111C                                                                                           |
| 1.07 | <i>FUR1</i>   | YHR128W                                                                                           |
| 1.06 | <i>DIP2</i>   | YLR129W                                                                                           |
| 1.06 |               | TS(AGA)L tRNA-Ser                                                                                 |
| 1.05 | <i>SPL2</i>   | YHR136C                                                                                           |
| 1.04 |               | TS(AGA)A tRNA-Ser                                                                                 |
| 1.04 |               | TS(AGA)D2 tRNA-Ser                                                                                |
| 1.03 |               | TS(AGA)E tRNA-Ser                                                                                 |
| 1.03 | <i>DSE3</i>   | YOR264W                                                                                           |
| 1.02 |               | non-annotated SAGE orf Found reverse in NC_001140 between 34593 and 34790                         |
| 1.02 |               | SNR70 snRNA                                                                                       |
| 1.02 |               | TS(AGA)M tRNA-Ser                                                                                 |
| 1.00 | <i>EGT2</i>   | YNL327W                                                                                           |
| 0.99 |               | TA(AGC)L tRNA-Ala                                                                                 |
| 0.99 |               | TL(GAG)G tRNA-Leu                                                                                 |
| 0.97 |               | YNR065C                                                                                           |
| 0.96 |               | non-annotated SAGE orf Found reverse in NC_001139 between 366397 and 366531                       |
| 0.96 |               | TA(AGC)M1 tRNA-Ala                                                                                |
| 0.96 |               | TA(AGC)K1 tRNA-Ala                                                                                |
| 0.95 |               | SNR73 snRNA                                                                                       |
| 0.94 |               | TS(AGA)J tRNA-Ser                                                                                 |
| 0.93 |               | YLR464W                                                                                           |
| 0.93 | <i>TNA1</i>   | YGR260W                                                                                           |
| 0.92 |               | TA(AGC)K2 tRNA-Ala                                                                                |
| 0.92 |               | SNR44 snRNA                                                                                       |
| 0.92 |               | non-annotated SAGE orf Found forward in NC_001147 between 1070794 and 1071003                     |
| 0.90 |               | TA(AGC)J tRNA-Ala                                                                                 |
| 0.90 |               | chromosome X, complete chromosome sequence. Found forward in NC_001142 between 14138 and 15137    |
| 0.90 | <i>SPS1</i>   | YDR523C                                                                                           |
| 0.88 |               | TS(AGA)B tRNA-Ser                                                                                 |
| 0.88 |               | SNR53 snRNA                                                                                       |
| 0.84 |               | TA(AGC)D tRNA-Ala                                                                                 |
| 0.80 |               | YMRWDELTA15                                                                                       |
| 0.80 |               | TA(AGC)M2 tRNA-Ala                                                                                |
| 0.79 |               | non-annotated SAGE orf Found reverse in NC_001136 between 678003 and 678185                       |
| 0.78 |               | non-annotated SAGE orf Found reverse in NC_001145 between 297849 and 297983                       |
| 0.74 | <i>PHO84</i>  | YML123C                                                                                           |
| 0.74 |               | non-annotated SAGE orf Found forward in NC_001147 between 464469 and 464630                       |
| 0.64 |               | YNR071C                                                                                           |
| 0.61 |               | YDL156W                                                                                           |
| 0.48 |               | non-annotated SAGE orf Found forward in NC_001143 between 145707 and 145880                       |

List of the 194 transcripts that decrease more than two-fold in GFP-*yra1-8* versus wild-type *YRA1*. The levels of the 194 transcripts were compared in the four indicated strains as described in supplementary Materials and Methods section.
