# Supplementary material
Source: PubMed Central journal article supplement (PMC549612)
Supplement: 7600527s2.pdf [file 7600527s2.pdf]

**Supplementary Table II.** Yeast vectors and plasmids used in this study

| Plasmid code | Plasmid name                                | Description                                                                                                    | References                       |
|--------------|---------------------------------------------|----------------------------------------------------------------------------------------------------------------|----------------------------------|
| pFS1876      | YCpLac33- <i>YRA1</i> (pURA3- <i>YRA1</i> ) | <i>YRA1</i> gene +/-500bp cloned as a <i>Bam</i> HI fragment into YCpLac33 ( <i>URA3</i> , CEN)                | (Stutz <i>et al.</i> , 2000)     |
| pFS1877      | YCpLac111- <i>YRA1</i>                      | <i>YRA1</i> gene +/-500bp cloned as a <i>Bam</i> HI fragment into YCpLac111 ( <i>LEU2</i> , CEN)               | This study                       |
| pFS2553      | YCpLac111-HA-GFP- <i>YRA1</i>               | GFP- <i>yral</i> +/-500pb (no intron) cloned as a <i>Bam</i> HI fragment into YCpLac111 ( <i>LEU2</i> , CEN)   | This study                       |
| pFS2554      | YCpLac111-HA-GFP- <i>yral-8</i>             | GFP- <i>yral-8</i> +/-500pb (no intron) cloned as a <i>Bam</i> HI fragment into YCpLac111 ( <i>LEU2</i> , CEN) | (Zenklusen <i>et al.</i> , 2002) |
| pFS2321      | YCpLacIII-HA- <i>YRA1</i> cDNA              | HA- <i>YRA1</i> cDNA +/- 500bp cloned as a <i>Bam</i> HI fragment into YcPac111 ( <i>LEU2</i> , CEN)           | (Zenklusen <i>et al.</i> , 2001) |
| pFS2328      | YCpLac111-HA- <i>yral-8</i>                 | HA- <i>yral-8</i> +/-500bp (no intron) cloned as a <i>Bam</i> HI fragment into YCpLac111 ( <i>LEU2</i> , CEN)  | (Zenklusen <i>et al.</i> , 2002) |
| pAC717       | <i>NAB2</i> WT                              | <i>NAB2</i> gene +/-400bp cloned as a <i>Xba</i> I/ <i>Xho</i> I fragment into pRS315 ( <i>LEU2</i> , CEN)     | (Green <i>et al.</i> , 2002)     |
| pAC1152      | $\Delta N$ - <i>nab2</i>                    | $\Delta N$ - <i>nab2</i> cloned into pRS315 ( <i>LEU2</i> , CEN)                                               | (Marfatia <i>et al.</i> , 2003)  |
| pFS2764      | YEplac112- <i>NAB2</i>                      | <i>NAB2</i> gene +/-500bp cloned as a <i>Bam</i> HI PCR fragment into YEplac112 ( <i>TRP1</i> , 2 $\mu$ )      | This study                       |
| pFS2015      | pLGSD5                                      | Galactose inducible $\beta$ -galactosidase reporter construct ( <i>URA3</i> , 2 $\mu$ )                        | (Legrain and Rosbash, 1989)      |
| pFS2738      | pGAL1-LacZ                                  | Galactose inducible $\beta$ -galactosidase reporter construct ( <i>URA3</i> , CEN)                             | (Chavez <i>et al.</i> , 2001)    |

**Supplementary Table III.** Yeast strains used in this study

| Strain code     | Name                                           | Genotype                                                                                                                            | References                      |
|-----------------|------------------------------------------------|-------------------------------------------------------------------------------------------------------------------------------------|---------------------------------|
| W303 background |                                                |                                                                                                                                     |                                 |
| W303            | wild-type                                      | <i>MATa ade2 his3 leu2 trp1 ura3</i>                                                                                                |                                 |
| FSY1026         | YRA1 shuffle                                   | <i>MATa ade2 his3 leu2 trp1 ura3 yral::HIS3</i> <pURA3-YRA1 gen; pFS1876>                                                           | (Stutz <i>et al</i> , 2000)     |
| FSY1062         | YRA1 shuffle $\Delta yra2$                     | <i>MATa ade2 his3 leu2 trp1 ura3 yra2::KAN<sup>r</sup> yral::HIS3</i> <pURA3-YRA1 gen; pFS1876>                                     | (Zenklusen <i>et al</i> , 2002) |
| FSY1286         | YRA1 shuffle $\Delta mlp1$                     | <i>MATa ade2 his3 leu2 trp1 ura3 mlp1::TRP1 yral::HIS3</i> <pURA3-YRA1 gen; pFS1876>                                                | This study                      |
| FSY1284         | YRA1 shuffle $\Delta mlp2$                     | <i>MATa ade2 his3 leu2 trp1 ura3 mlp2::TRP1 yral::HIS3</i> <pURA3-YRA1 gen; pFS1876>                                                | This study                      |
| FSY1528         | YRA1 shuffle $\Delta mlp1/2$                   | <i>MATa ade2 his3 leu2 trp1 ura3 mlp1::TRP1 mlp2::TRP1 yral::HIS3</i>                                                               | This study                      |
| FSY1621         | YRA1 shuffle $\Delta rrp6$                     | <i>MATa ade2 his3 leu2 trp1 ura3 rrp6::KAN<sup>r</sup> yral::HIS3</i> <pURA3-YRA1 gen; pFS1876>                                     | This study                      |
| FSY1718         | YRA1 shuffle $\Delta mlp1 \Delta rrp6$         | <i>MATa ade2 his3 leu2 trp1 ura3 mlp1::TRP1 rrp6::KAN<sup>r</sup> yral::HIS3</i> <pURA3-YRA1 gen; pFS1876>                          | This study                      |
| FSY1678         | YRA1 shuffle $\Delta mlp2 \Delta rrp6$         | <i>MATa ade2 his3 leu2 trp1 ura3 mlp2::TRP1 rrp6::KAN<sup>r</sup> yral::HIS3</i> <pURA3-YRA1 gen; pFS1876>                          | This study                      |
| FSY1744         | YRA1 shuffle $\Delta mlp1/2 \Delta rrp6$       | <i>MATa ade2 his3 leu2 trp1 ura3 mlp1::TRP1 mlp2::TRP1 rrp6::KAN<sup>r</sup> yral::HIS3</i>                                         | This study                      |
| FSY1485         | YRA1 gen                                       | <i>MATa ade2 his3 leu2 trp1 ura3 yral::HIS3</i> <pLEU2-YRA1 gen; pFS1877>                                                           | (Zenklusen <i>et al</i> , 2002) |
| FSY1568         | GFP- <i>yra1</i>                               | <i>MATa ade2 his3 leu2 trp1 ura3 yral::HIS3</i> <pLEU2-HA-GFP- <i>yra1</i> ; pFS2553>                                               | This study                      |
| FSY1063         | GAL GFP- <i>yra1-8</i>                         | <i>MATa ade2 his3 leu2 trp1 ura3 yral::HIS3</i> <pTRP1-GAL-GFP- <i>yra1-8</i> ; pFS1975>                                            | This study                      |
| FSY1376         | GFP- <i>yra1-8</i>                             | <i>MATa ade2 his3 leu2 trp1 ura3 yral::HIS3</i> <pTRP1-HA-GFP- <i>yra1-8</i> ; pFS2557>                                             | (Zenklusen <i>et al</i> , 2002) |
| FSY1486         | GFP- <i>yra1-8</i>                             | <i>MATa ade2 his3 leu2 trp1 ura3 yral::HIS3</i> <pLEU2-HA-GFP- <i>yra1-8</i> ; pFS2554>                                             | (Zenklusen <i>et al</i> , 2002) |
| FSY1786         | <i>yra1-8</i>                                  | <i>MATa ade2 his3 leu2 trp1 ura3 yral::HIS3</i> <pLEU2-HA- <i>yra1-8</i> ; pFS2328>                                                 | This study                      |
| FSY1576         | YRA1 gen $\Delta mlp1$                         | <i>MATa ade2 his3 leu2 trp1 ura3 mlp1::TRP1 yral::HIS3</i> <pLEU2-YRA1 gen; pFS1877>                                                | This study                      |
| FSY1577         | GFP- <i>yra1-8</i> $\Delta mlp1$               | <i>MATa ade2 his3 leu2 trp1 ura3 mlp1::TRP1 yral::HIS3</i> <pLEU2-HA-GFP- <i>yra1-8</i> ; pFS2554>                                  | This study                      |
| FSY1487         | YRA1 gen $\Delta mlp2$                         | <i>MATa ade2 his3 leu2 trp1 ura3 mlp2::TRP1 yral::HIS3</i> <pLEU2-YRA1 gen; pFS1877>                                                | This study                      |
| FSY1488         | GFP- <i>yra1-8</i> $\Delta mlp2$               | <i>MATa ade2 his3 leu2 trp1 ura3 mlp2::TRP1 yral::HIS3</i> <pLEU2-HA-GFP- <i>yra1-8</i> ; pFS2554>                                  | This study                      |
| FSY1534         | YRA1 gen $\Delta mlp1 \Delta mlp2$             | <i>MATa ade2 his3 leu2 trp1 ura3 mlp1::TRP1 mlp2::TRP1 yral::HIS3</i> <pLEU2-YRA1 gen; pFS1877>                                     | This study                      |
| FSY1535         | GFP- <i>yra1-8</i> $\Delta mlp1 \Delta mlp2$   | <i>MATa ade2 his3 leu2 trp1 ura3 mlp1::TRP1 mlp2::TRP1 yral::HIS3</i> <pLEU2-HA-GFP- <i>yra1-8</i> ; pFS2554>                       | This study                      |
| FSY1758         | YRA1 gen $\Delta rrp6$                         | <i>MATa ade2 his3 leu2 trp1 ura3 rrp6::KAN<sup>r</sup> yral::HIS3</i> <pLEU2-YRA1 gen; pFS1877>                                     | (Zenklusen <i>et al</i> , 2002) |
| FSY1764         | GFP- <i>yra1-8</i> $\Delta mlp1 \Delta rrp6$   | <i>MATa ade2 his3 leu2 trp1 ura3 mlp1::TRP1 rrp6::KAN<sup>r</sup> yral::HIS3</i> <pLEU2-HA-GFP- <i>yra1-8</i> ; pFS2554>            | This study                      |
| FSY1765         | GFP- <i>yra1-8</i> $\Delta mlp2 \Delta rrp6$   | <i>MATa ade2 his3 leu2 trp1 ura3 mlp2::TRP1 rrp6::KAN<sup>r</sup> yral::HIS3</i> <pLEU2-HA-GFP- <i>yra1-8</i> ; pFS2554>            | This study                      |
| FSY1766         | GFP- <i>yra1-8</i> $\Delta mlp1/2 \Delta rrp6$ | <i>MATa ade2 his3 leu2 trp1 ura3 mlp1::TRP1 mlp2::TRP1 rrp6::KAN<sup>r</sup> yral::HIS3</i> <pLEU2-HA-GFP- <i>yra1-8</i> ; pFS2554> | This study                      |
| FSY1812         | <i>yra1-8</i> $\Delta rrp6$                    | <i>MATa ade2 his3 leu2 trp1 ura3 rrp6::KAN<sup>r</sup> yral::HIS3</i> <pLEU2-HA- <i>yra1-8</i> ; pFS2328>                           | (Zenklusen <i>et al</i> , 2002) |
| FSY2053         | <i>yra1-8</i> $\Delta mlp1/2 \Delta rrp6$      | <i>MATa ade2 his3 leu2 trp1 ura3 mlp1::TRP1 mlp2::TRP1 rrp6::KAN<sup>r</sup> yral::HIS3</i> <pLEU2-HA- <i>yra1-8</i> ; pFS2328>     | This study                      |
| FSY2254         | $\Delta yra1 \Delta mlp2$                      | <i>MATa ade2 his3 leu2 trp1 ura3 yral::HIS3 mlp2::TRP1</i>                                                                          | This study                      |
| FSY1567         | Mlp1-ProtA                                     | <i>MATa ade2 his3 leu2 trp1 ura3 MLP1-ProtA-KAN<sup>r</sup> yral::HIS3</i> <pURA3-YRA1 gen; pFS1876>                                | This study                      |
| FSY1351         | Mlp2-ProtA                                     | <i>MATa ade2 his3 leu2 trp1 ura3 MLP2-ProtA-KAN<sup>r</sup> yral::HIS3</i> <pURA3-YRA1 gen; pFS1876>                                | This study                      |
| ACY429          | NAB2 shuffle                                   | <i>MATa his3 leu2 trp1 ura3 nab2::HIS3</i> <pURA3-NAB2; pAC636>                                                                     | (Green <i>et al</i> , 2002)     |
| FSY2081         | NAB2 shuffle $\Delta mlp1$                     | <i>MATa his3 leu2 trp1 ura3 mlp1::TRP1 nab2::HIS3</i> <pURA3-NAB2; pAC636>                                                          | This study                      |
| FSY2082         | NAB2 shuffle $\Delta mlp2$                     | <i>MATa his3 leu2 trp1 ura3 mlp2::TRP1 nab2::HIS3</i> <pURA3-NAB2; pAC636>                                                          | This study                      |
